# Supplementary material for: Fluorescent silica nanoparticles modified chemically with terbium complexes as potential bioimaging probes: their fluorescence and colloidal properties in water
Source: Royal Society of Chemistry journal article supplement (doi:10.1039/c4nj01222d), 2014-12-10

**Supplementary Information for**

**Fluorescent silica nanoparticles modified chemically with terbium complexes as potential bioimaging probes: Their fluorescent and colloidal properties in water**

**Yoshio Nakahara,<sup>a</sup> Yoichi Tatsumi,<sup>a</sup> Ikuko Akimoto,<sup>a</sup> Shusuke Osaki,<sup>b</sup> Motomichi Doi<sup>c</sup> and Keiichi Kimura<sup>a\*</sup>**

*<sup>a</sup>Department of Applied Chemistry, Faculty of Systems Engineering, Wakayama University, Sakae-dani 930, Wakayama 640-8510, Japan.*

*<sup>b</sup>Industrial Technology Center of Wakayama Prefecture, 60 Ogura, Wakayama 649-6261, Japan*

*<sup>c</sup>National Institute of Advanced Industrial Science and Technology, Central 6, 1-1-1 Higashi, Tsukuba 305-8566, Japan*

**Supporting Information**

**Fig. S1** Fluorescence spectra of **Tb-SNPs** synthesized using different amounts of APTES in water.

**Fig. S2** Size distributions of **Tb-SNPs** synthesized using different amounts of APTES in water.

**Fig. S1**

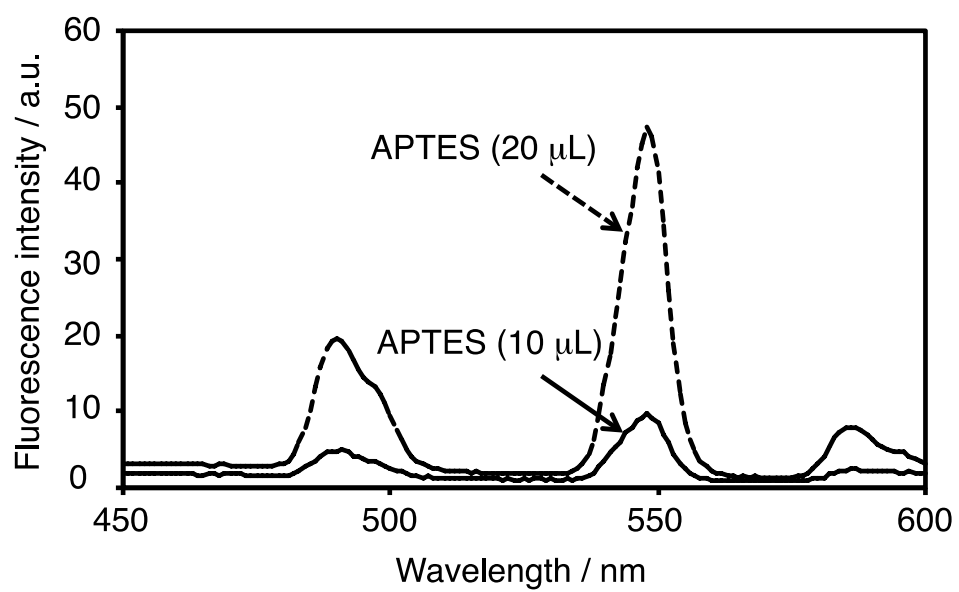

**Fig. S2**

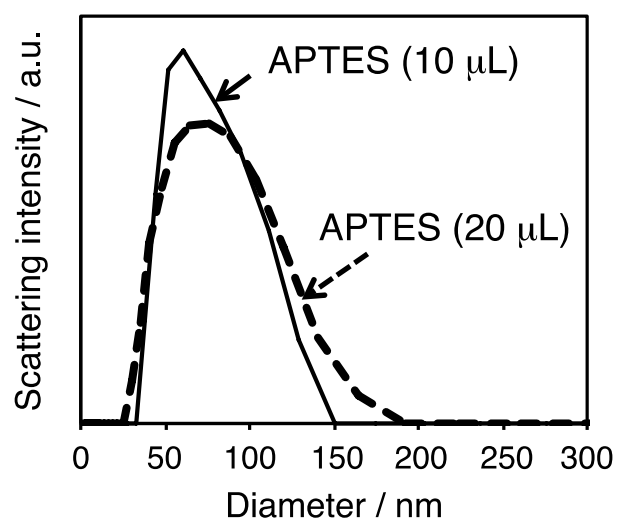

Supplement: c4nj01222d1.pdf [file c4nj01222d1.pdf]
